# Supplementary material for: Composite banded core and non-banded shell transition patterns in stereocomplexed poly(lactide acid) induced by strongly interacting poly(p-vinyl phenol)
Source: Royal Society of Chemistry journal article supplement (doi:10.1039/c4ra09859e), 2014-01-01
Supplement: c4ra09859e1.pdf [file c4ra09859e1.pdf]

**Supporting Information (Figure S1, S2, S3, S4, S5)**

**Composite Banded Core and Non-banded Shell Transition Patterns in Stereocomplexed  
Poly(lactide acid) Induced by Strongly Interacting Poly(*p*-vinyl phenol)**

Hikmatun Ni'mah,<sup>a,b</sup> Eamor M. Woo,<sup>a\*</sup> and Shih-Min Chang<sup>a</sup>

<sup>a</sup>Department of Chemical Engineering, National Cheng Kung University, Tainan, 701, Taiwan.

<sup>b</sup>Department of Chemical Engineering, Faculty of Industrial Technology, Sepuluh Nopember Institute of Technology, Kampus ITS Sukolilo, Surabaya, East Java 60111, Indonesia

\*Author to whom correspondence should be addressed: emwoo@mail.ncku.edu.tw

Fax: +886 6 234-4496, Tel: +886 6 275-7575 Ex. 62670.

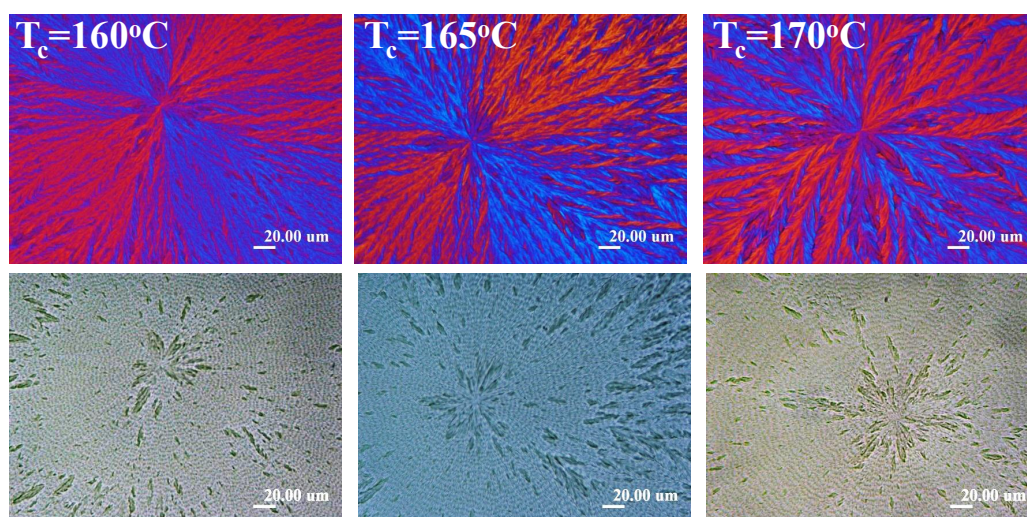

**Figure S1.** POM and OM images showing the crystalline morphology of sc-PLA/PVPh (80/20) blend at various crystallization temperatures ( $T_c$ s).

**(a) sc-PLA/PVPh (95/5) 240°C-1min- $T_c$**

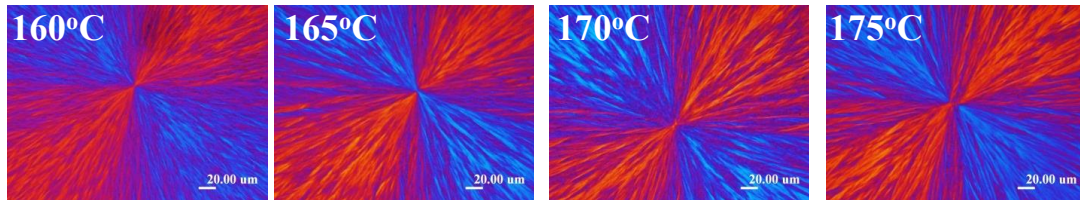

**(b) sc-PLA/PVPh (90/10) 240°C-1min- $T_c$**

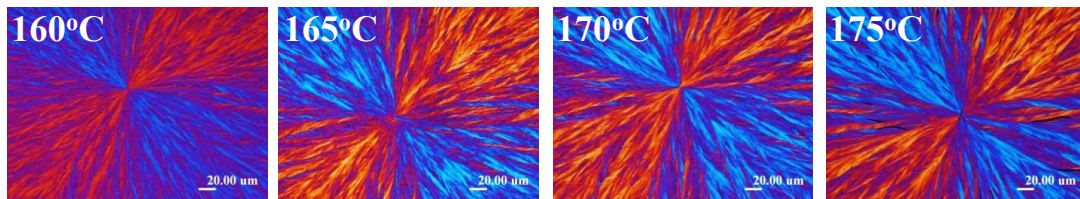

**Figure S2.** Crystalline morphology of (a) sc-PLA/PVPh (95/5) and (b) sc-PLA/PVPh (90/10) blends at various crystallization temperatures ( $T_c$ s).

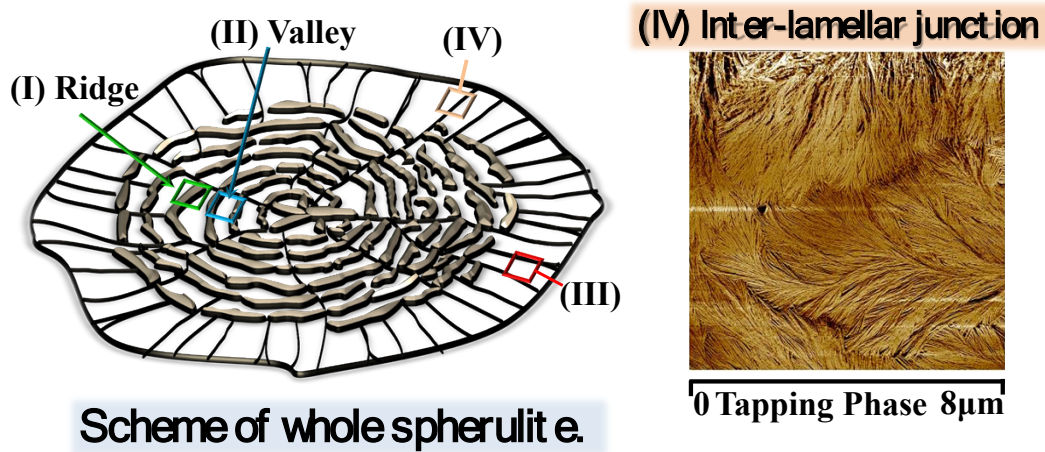

**Figure S3.** Scheme of whole spherulite and AFM micrograph of (IV) inter-lamellar junction in non-banded peripheral region of the spherulite. [Regions-I, II, III are discussed in the main texts.]

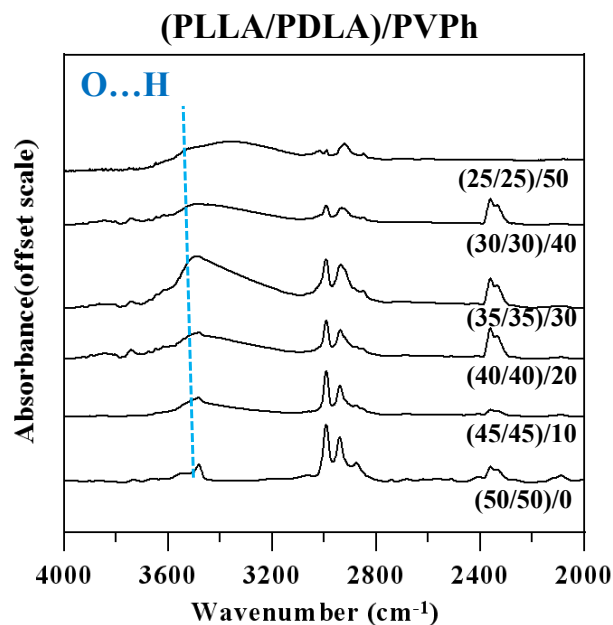

**Figure S4.** FTIR spectra in hydroxyl-stretching region for (PLLA/PDLA)/PVPh blend of various compositions as indicated on traces.

**sc-PLA/PVPh (70/30) 240°C- $t_{max}$ -170°C**

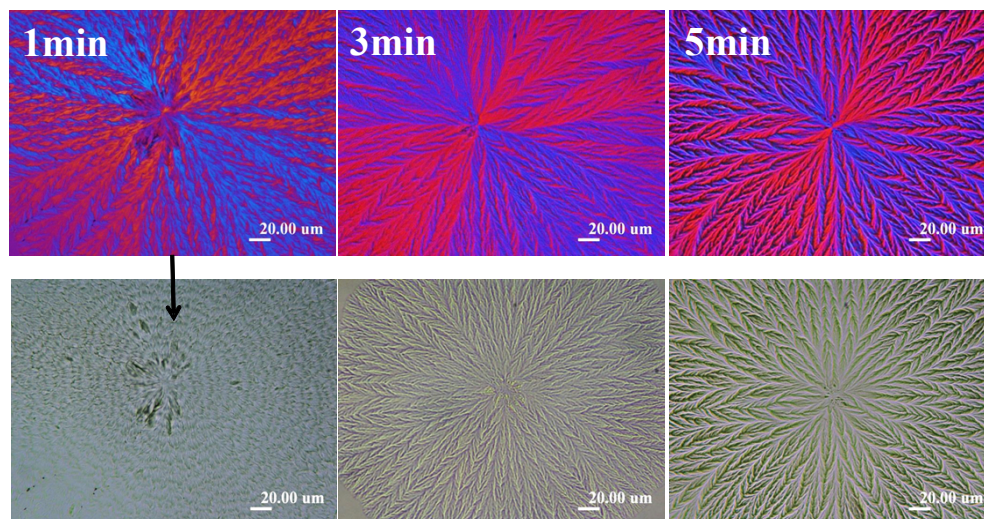

**Figure S5.** The crystalline morphology of sc-PLA/PVPh (70/30) blend at  $T_c=170^\circ\text{C}$  and various  $t_{max}$ .

The results in Fig. S5 indicate that the time held at  $T_{max}=240^\circ\text{C}$  (1, 3, 5 min, respectively) significantly influences the spherulite morphology. For short  $t_{max}$  (1 min), the spherulite assumes a morphology of ring-banded core superimposed on dendritic lamellae, while for  $t_{max}$  increased to 3 and 5 min, respectively, the ring-band pattern in the central core entirely disappears and the dendritic patterns further intensify to flower-petal shapes.
